# Supplementary material for: Integrated analysis of the molecular action of Vorinostat identifies epi-sensitised targets for combination therapy
Source: PubMed Central journal article supplement (PMC5620222; doi:10.18632/oncotarget.18910), 2017-07-01
Supplement: oncotarget-08-67891-s001.pdf [file oncotarget-08-67891-s001.pdf]

# Integrated analysis of the molecular action of Vorinostat identifies epi-sensitised targets for combination therapy

## SUPPLEMENTARY MATERIALS

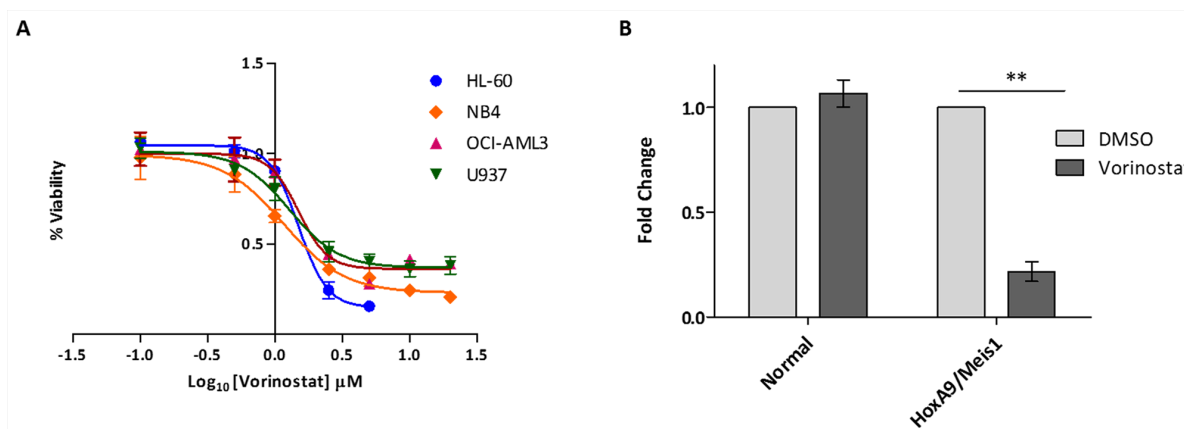

**Supplementary Figure 1: Vorinostat exhibits preferential cytotoxicity in leukemic cells.** (A) Vorinostat exhibits similar toxicity in a panel of four AML cells lines including HL-60, NB4, U937 and OCI-AML3. Despite showing potency in leukemic cells, Vorinostat spares normal cells. (B) Normal murine bone marrow and leukemic cells derived from a *HoxA9/Meis1* overexpressing mouse model were treated for 24 hours with 1 μM Vorinostat. Cell viability was measured using the CellTiter-Glo® assay. Data represents a technical replicate of 3. Significance, as calculated by two-way ANOVA, is denoted as \* = P<0.05, \*\* = P<0.01 and \*\*\* = P<0.001.

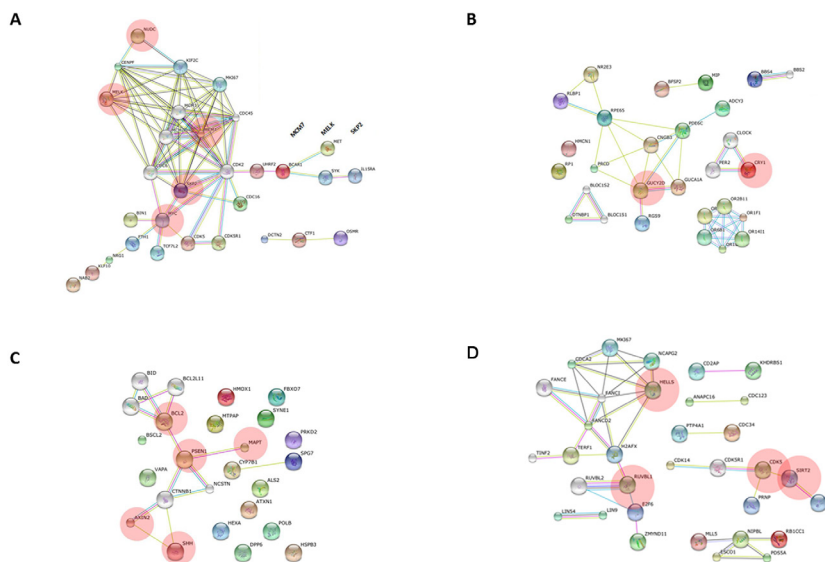

**Supplementary Figure 2: Identifying the biological processes associated with changes in histone H3K9 acetylation.** Gene lists associated with specific biological functions of interest, those which have features in the functional annotation of this ChIP-SEQ dataset were compiled. Gene lists were subjected to network analysis using STRING to identify significant nodes of genes associated with increased H3K9Ac following Vorinostat treatment: (A) cell proliferation, (B) metabolism, (C) cell death and (D) cell cycle. Additional nodes, shown in white, were added to further connect genes. Genes highlighted in red were selected for further validation by RQ-PCR. Data is presented as a fold change relative to the DMSO control, whereby any genes below the x-axis are down-regulated and those above, up-regulated. Experiment was carried out in a biological replicate of three. Significance, as calculated by two-way ANOVA, is denoted as \* = P<0.05, \*\* = P<0.01 and \*\*\* = P<0.001.

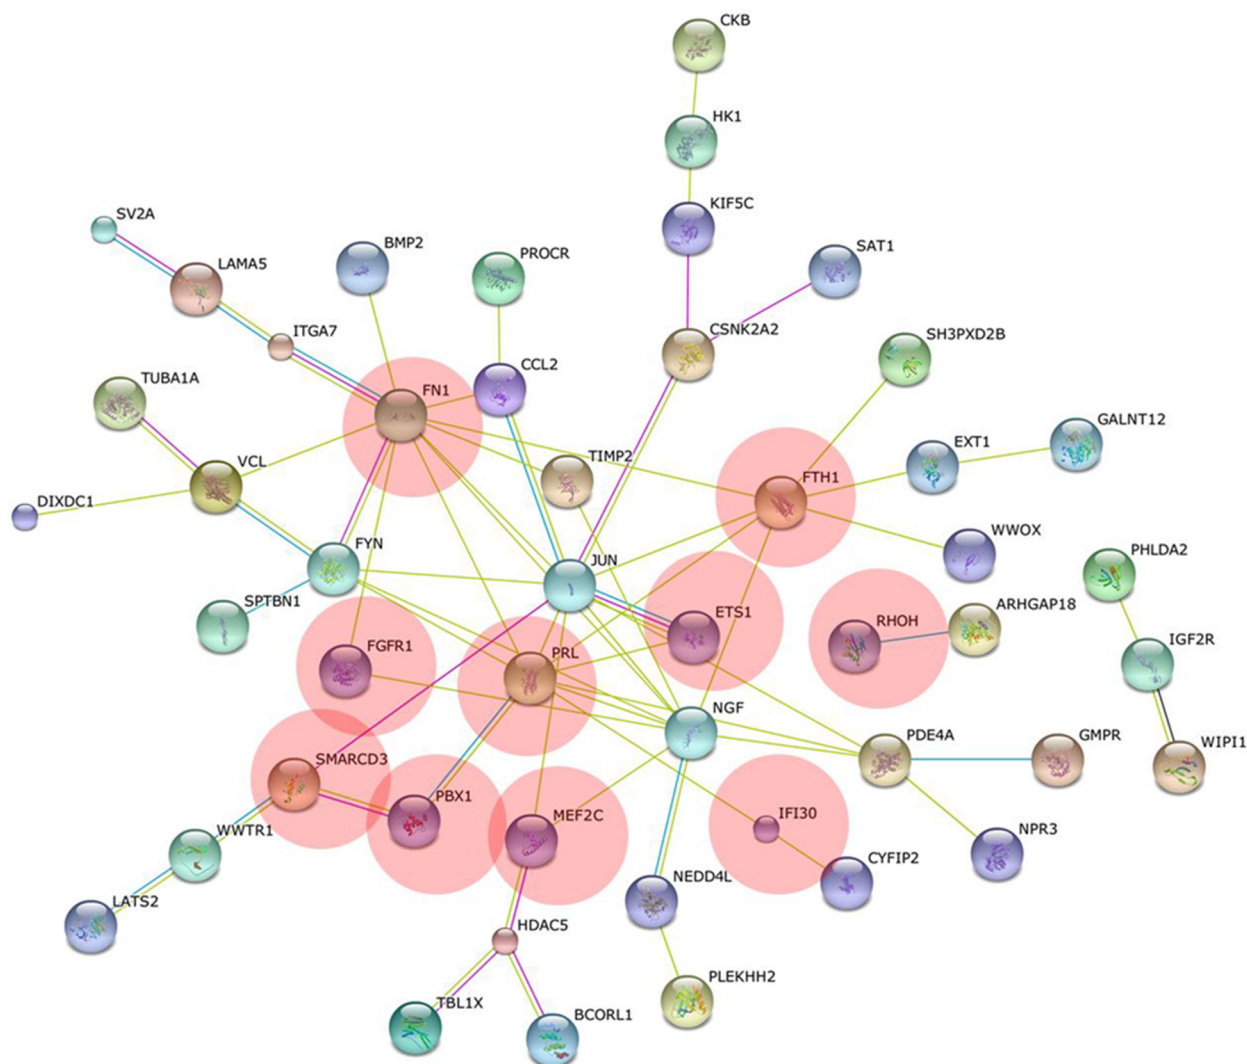

**Supplementary Figure 3: Protein-protein interaction networking of genes which Vorinostat significantly altered in both gene expression and in H3K9Ac binding.** Gene lists were created following the overlapping of data using BioVenn, whereby overlaps were genes which were associated with an increase in H3K9Ac/increased expression, and genes which were associated with a decrease in H3K9Ac/decreased expression. A list of 142 genes was mapped to assess protein-protein interactions using STRING. Unconnected nodes were removed, resulting in 48 networked nodes. Genes highlighted in red were randomly selected for validation by RQ-PCR.

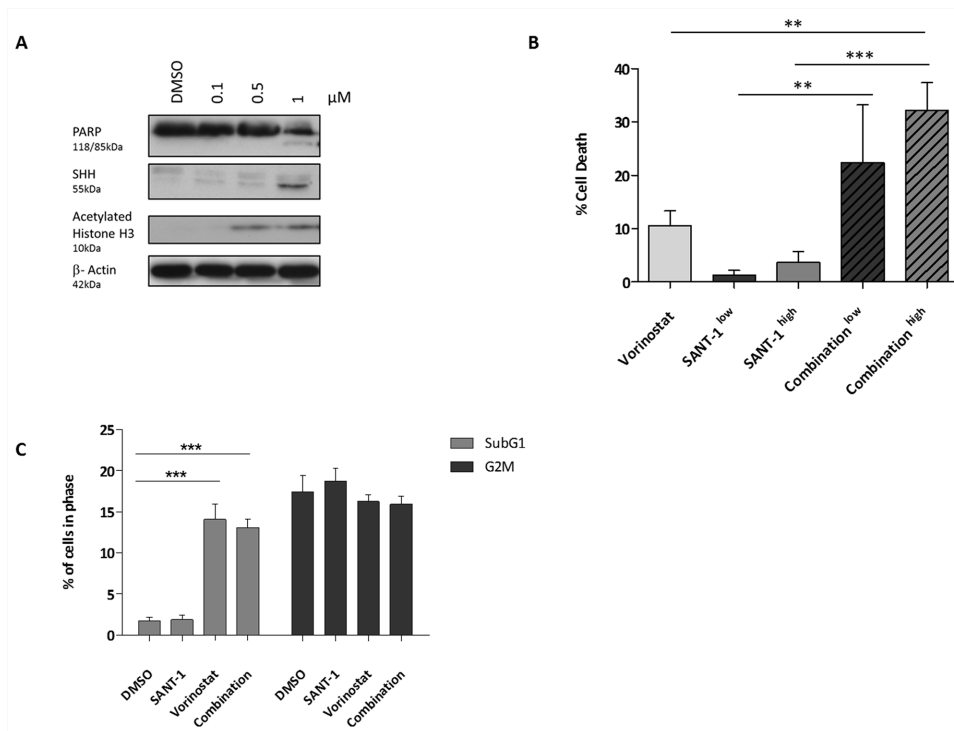

**Supplementary Figure 4: The sonic hedgehog signalling pathway is a potential therapeutic target for combination therapy.** (A) HL-60 cells treated with Vorinostat or DMSO for 24 hours. Equal loading was confirmed with β-Actin. (B) Percentage cell death of HL-60 cells was measured using the CellTiter-Glo® viability assay following 24 hours treatment with either sequential treatment of 1 μM Vorinostat with low (0.1 μM) or high dose (2.5 μM) SANT-1, or single agents. Data represents a biological replicate of 3, with data presented relative to the DMSO control (0% cell death). (C) Cell cycle analysis of propidium iodide stained OCI-AML3 cells in SubG1 and G2-M phases of the cell cycle following 24 hours with either DMSO vehicle control, single agents or combination treatment. Significance, as calculated by two-way ANOVA, is denoted as \* = P<0.05, \*\* = P<0.01 and \*\*\* = P<0.001. Data represents a biological replicate of 3.

**Supplementary Table 1: Genes identified as being significantly up- or downregulated following Vorinostat treatment as identified by transcriptome analysis.**

See Supplementary File 1

Supplementary Table 2: RQ-PCR primer sequences

|           |                          |           |                           |
|-----------|--------------------------|-----------|---------------------------|
| ADI1_F    | GTATATGGACGACGCCCC       | ADI1_R    | TCATTCTCATATTTGTCAGCATCC  |
| AXIN2_F   | GTCCATGACGGACAGCAGTG     | AXIN2_R   | TGGGTTCTCGGAAATGAGGT      |
| BCL2_F    | AGATTGATGGGATCGTTGCCT    | BCL2_R    | AGTCTACTTCCTCTGTGATGTTGT  |
| BRD4_F    | TCTGACAGCGAAGACTCCGA     | BRD4_R    | GGTGGTGATGATGGTGCTTCT     |
| CDK5_F    | GGTGACCTCGATCCTGAGATTG   | CDK5_R    | CCCAAAGAGGACATCCGGT       |
| C-FOS_F   | TTAGGACATCTGCGTCAGCAGGTT | C-FOS_R   | TCTCGTGAGCATTTCGCAGTTTCT  |
| CRY1_F    | GGACTAGGTCTTCTGGCATCA    | CRY1_R    | ACCACTCCCTTGAGAGCAAC      |
| CYSTM1_F  | CAGACCCGACCGTTATCCAG     | CYSTM1_R  | TCCTGGACCCATTGGTTGTG      |
| ETS1_F    | GGCCAAAACCGTTGTTGTGTT    | ETS1_R    | AGAATCCTCAGCCGGCAAAT      |
| FCGR1B_F  | ATGGCACCTACCATTGCTCA     | FCGR1B_R  | TGGTAACTGGAGGCCTTTTAC     |
| FGFR1_F   | CACAGAGACCCACCTTCAAGC    | FGFR1_R   | TGGTTGGAGGTCAAGGCCAC      |
| FN1_F     | CTGGCCAGTCCTACAACCAG     | FN1_R     | AGTGTTTGTCTCTGATGGTATCT   |
| FTH1_F    | CAGGTGCGCCAGAACTACCA     | FTH1_R    | AAAGCCACATCATCGCGGTC      |
| GAPDH_F   | GTCGCCAGCCGAGCCACATC     | GAPDH_R   | GGTGACCAGGCGCCAATACG      |
| GUCY2D_F  | GTCTATGAGGGAGACAGGGTTTG  | GUCY2D_R  | GGTAGAGGGCCACGTTCTCA      |
| HELLS_F   | TGACGAAAATGGAACAGCAACA   | HELLS_R   | CCTCATAACTGGCTTCTCTTCACT  |
| IFI30_F   | CCCTCTGCAAGCGTTAGACT     | IFI30_R   | CAAGCGGTGCATTGGACTTC      |
| IL8_F     | TACTCCAAACCTTTCCACCCC    | IL8_R     | CCCAGTTTTCCTTGGGGTCC      |
| IQGAP3_F  | AAAGAACATGCCCCGGGTAG     | IQGAP3_R  | TATCTGAGGGGCCAATCCCA      |
| LAMA5_F   | TGCTGGACCTCATTGTGACC     | LAMA5_R   | GCGGCAGCCAAAATAGTCAG      |
| LIMA1_F   | AATAGCCTGGCAGTCCGTTT     | LIMA1_R   | ACAGGCTGTTGAACCTCACT      |
| MAPT_F    | AGTTGACCTGAGCAAGGTGAC    | MAPT_R    | GGACCCAATCTTCGACTGGAC     |
| MCM7_F    | CCCAGTTTGAACCTCTGGACA    | MCM7_R    | TCCACGTATGCTGCTGTGAT      |
| MEF2C_F   | CACTGGCTCACCTTCTCTG      | MEF2C_R   | ATTGCCATACCCGTTCCCTG      |
| MELK_F    | CCAGTGCCTGAAAGAACTCC     | MELK_R    | ATCCAATTCCACTGAGCGGC      |
| MYC_F     | GGACCCGCTTCTCTGAAAGG     | MYC_R     | TAACGTTGAGGGGCATCGTC      |
| NUDC_F    | TGCAGGAGCTTGTGAACACCTT   | NUDC_R    | TTGTGGTGGCTGAAAGTCTGT     |
| PBX1_F    | CACAGGTGGATAACCTTCGC     | PBX1_R    | CCACGTTGGAAGTCGGAAGT      |
| PRL_F     | GTGACCCCTCGAGACCTGTT     | PRL_R     | GGCCTTGGTAATGAACCCCC      |
| PSEN1_F   | CCTGCACCGTTGTCTACTT      | PSEN1_R   | GTGCTCCTGCCGTTCTCTAT      |
| RHOH_F    | TTCTTCGGCATTCTGCAACAG    | RHOH_R    | TCTTCAACTGGTGTGTGAAGGAGAA |
| RUVBL1_F  | TTGCATGACTTGGATGTGGC     | RUVBL1_R  | CCCCTCGAAGTTTGTCTGTG      |
| SAT2_F    | CTGCAATCATCCAATGGTCG     | SAT2_R    | GATTCCATTCGGGTCCATTC      |
| SF3A1_F   | ACGGACCAGGTCTCTGTCAT     | SF3A1_R   | CGCCATTGGCCATGTTGTAG      |
| SHH_F     | CCCCAATTACAACCCCGACA     | SHH_R     | GGCCAAAGCGTTCAACTTGT      |
| SIRT2_F   | GCACGGCACCTTCTACACAT     | SIRT2_R   | AGACGATATCAGGCTTCAACCAG   |
| SMARCD3_F | TGGCCGCGGACGAAGTT        | SMARCD3_R | TTTGCTTTTCGTGGCTTTGCG     |
| TAPBP_F   | TGTTGGTTTCGTGGAGGATGC    | TAPBP3_R  | GGTGAGGACAGTCAGTACCA      |
| TCN1_F    | GGTCTTACCTGCCCTGATGG     | TCN1_R    | GTGAGTCAGGAGGTGTCACAG     |
